# Supplementary material
Source: publisher figshare collection journal article supplement (https://sage.figshare.com/ndownloader/files/31566804)

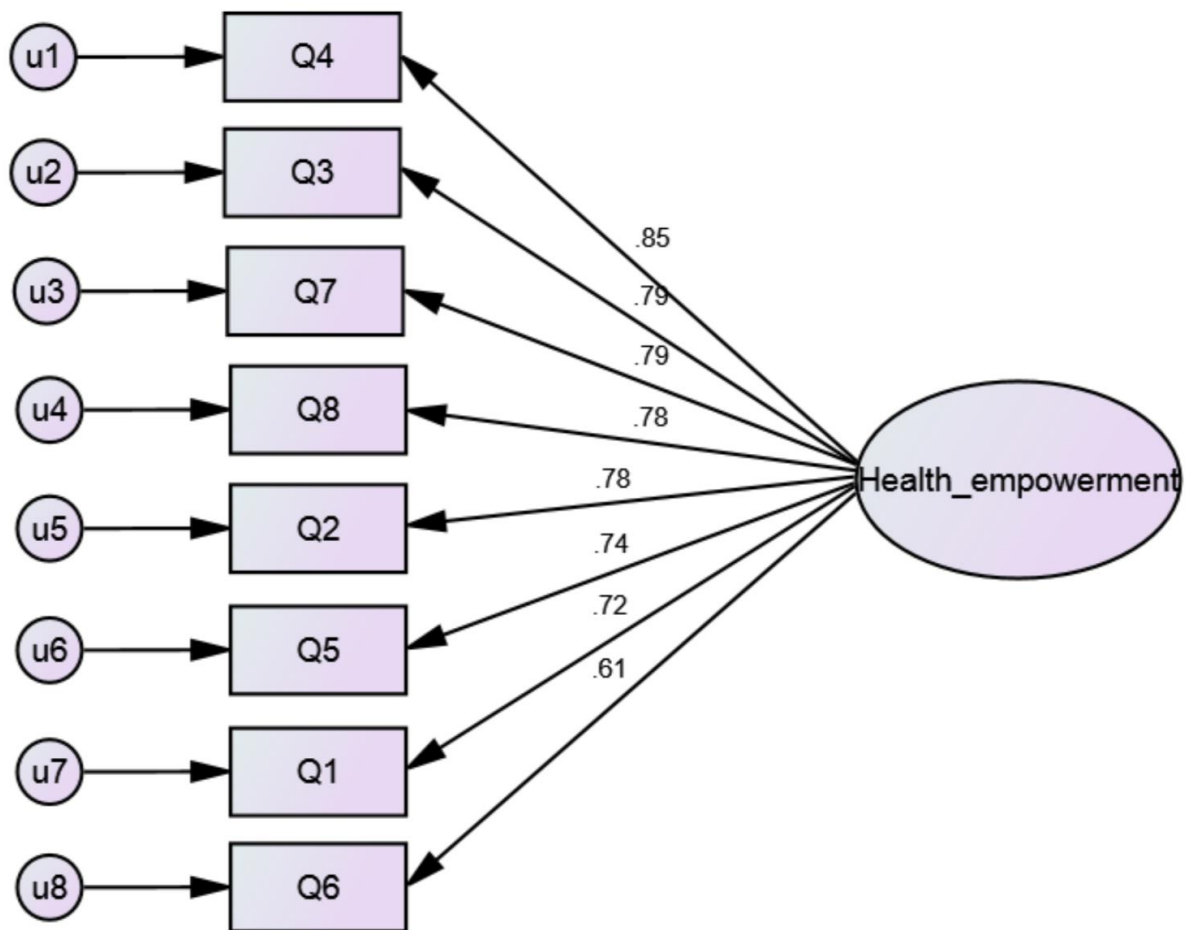

Figure 1 Confirmatory factor analysis of the Health Empowerment Scale – Arabic version

Supplement: Supplementary file 1 [file 31566804]
